# Supplementary material for: “There’s two people going through this”: Exploring the Impact of Cancer on Male Intimate Partners and Spouses
Source: Research Square preprint supplement (doi:10.21203/rs.3.rs-7480572/v1), 2025-10-20
Supplement: Supplementary file 1 [file 0f9ca9590d9081f8dcd92370.docx]

**Interview Schedule**

**Introduction**

Can you tell me about your relationship with your partner or spouse before their diagnosis?

Can you tell me about your relationship with your partner or spouse now?

When your partner or spouse was first diagnosed with cancer, what was that moment like for you?

- Follow up: Has this changed over time?

Did you have any primary concerns when you first learned about the diagnosis?

- Follow up: If so, have they changed at all?

Have you and your partner had to navigate adjustments brought on by the cancer diagnosis over time?

- Follow up: Are there any particular examples of adjustment that stand out to you?
- Follow up: How did you support each other during these adjustments?

**Intimate Partner or Spouse Relationship**

Has the diagnosis affected your relationship with your partner or spouse?

- Follow up: Tell me about any other experiences related to cancer that have impacted your relationship?

In what ways do you think your partner has changed since the diagnosis, and how has that affected your relationship?

How has your role in your relationship changed since your spouse or partner’s cancer diagnosis?

- Follow up: What new roles or responsibilities, if any, have you taken on since your spouse or partner’s diagnosis?
- Follow up: How do you see your roles and responsibilities continuing to change?
- Follow up: In what ways, if any, have you found yourself taking on caregiving responsibilities during your spouse or partner’s illness?

**Masculinity**

As a man, have expectations of friends and family impacted the way you’ve dealt with your partners illness?

- Follow up: Have you felt any pressure to conform to these expectations, or have you challenged them in any way?

Have there been moments where you felt like certain expectations about you as a man affected your ability to express emotions or ask for help?

- Follow up: How did you navigate those feelings?

**Support & Help Seeking Behaviours**

Tell me how you about the support you provided your partner or spouse before their cancer diagnosis?

- Follow up: Tell me about the support you provide your partner or spouse through their journey of cancer.

What support did you receive during you experience with cancer?

How have you sought support during your experience with cancer?

- Follow up: If you accessed any professional organisations or support networks, could you tell me about their impact on you?

- If yes, were there any factors that helped you to seek help?

- If no, what were your reasons? Was there anything that made it difficult or stopped you from seeking help?

How did these forms of support impact your wellbeing?

What did you do to support yourself?

- Were there any specific strategies or activities that helped you cope?

**Future/ Recommendations**

Is there anything you haven’t mentioned that really stands out to you that helped your wellbeing?

Do you think that there is anything that could be done to better help the significant others like you?

- Follow up: Are there any supports you wish received?

Is there anything else that you would like to comment on that we haven’t discussed today?
